# Supplementary material for: Identifying self-report measures of emotion regulation and evaluating their psychometric properties: a protocol for a systematic review
Source: HighWire-hosted journal article supplement (doi:10.1136/bmjopen-2021-056193), 2022-05-01
Supplement: bmjopen-2021-056193supp001_data_supplement.pdf [file bmjopen-2021-056193supp001_data_supplement.pdf]

## Appendix: Search Strategies

### 1. WOS

((TI=(((("emotion regulation" OR "affect regulation" OR "emotion dysregulation" OR "affect dysregulation") AND ("instrument\*" OR "measure" OR "measurement" OR "measuring" OR "questionnaire" OR "questionnaires" OR "scale" OR "scales") AND ("psychometric" OR "validity" OR "validation" OR "reliability" OR "internal consistency" OR "alpha" OR "cronbach" OR "re-test" OR "retest" OR "temporal stability"))) ) OR AB=(((("emotion regulation" OR "affect regulation" OR "emotion dysregulation" OR "affect dysregulation") AND ("instrument\*" OR "measure" OR "measurement" OR "measuring" OR "questionnaire" OR "questionnaires" OR "scale" OR "scales") AND ("psychometric" OR "validity" OR "validation" OR "reliability" OR "internal consistency" OR "alpha" OR "cronbach" OR "re-test" OR "retest" OR "temporal stability"))))) AND LANGUAGE: (English OR Spanish) AND DOCUMENT TYPES: (Article)

### 2. PUBMED

((("emotion regulation"[Title/Abstract] OR "affect regulation"[Title/Abstract] OR "emotion dysregulation"[Title/Abstract] OR "affect dysregulation"[Title/Abstract]) AND ("instrument\*" [Title/Abstract] OR "measure"[Title/Abstract] OR "measurement"[Title/Abstract] OR "measuring"[Title/Abstract] OR "questionnaire"[Title/Abstract] OR "questionnaires"[Title/Abstract] OR "scale"[Title/Abstract] OR "scales"[Title/Abstract]) AND ("psychometric"[Title/Abstract] OR "validity"[Title/Abstract] OR "validation"[Title/Abstract] OR "reliability"[Title/Abstract] OR "internal consistency"[Title/Abstract] OR "alpha"[Title/Abstract] OR "cronbach"[Title/Abstract] OR "re-test"[Title/Abstract] OR "retest"[Title/Abstract] OR "temporal stability"[Title/Abstract]))

### 3. SCOPUS

TITLE-ABS ( ( "emotion regulation" OR "affect regulation" OR "emotion dysregulation" OR "affect dysregulation" ) AND ( "instrument\*" OR "measure" OR "measurement" OR "measuring" OR "questionnaire" OR "questionnaires" OR "scale" OR "scales" ) AND (

"psychometric" OR "validity" OR "validation" OR "reliability" OR "internal consistency" OR "alpha" OR "cronbach" OR "re-test" OR "retest" OR "temporal stability" ) ) AND ( LIMIT-TO ( LANGUAGE , "English" ) OR LIMIT-TO ( LANGUAGE , "Spanish" ) ) AND ( LIMIT-TO ( SRCTYPE , "j" ) )

#### 4. PROQUEST

((TI("emotion regulation" OR "affect regulation" OR "emotion dysregulation" OR "affect dysregulation") AND ("instrument\*" OR "measure" OR "measurement" OR "measuring" OR "questionnaire" OR "questionnaires" OR "scale" OR "scales") AND ("psychometric" OR "validity" OR "validation" OR "reliability" OR "internal consistency" OR "alpha" OR "cronbach" OR "re-test" OR "retest" OR "temporal stability"))) OR AB(("emotion regulation" OR "affect regulation" OR "emotion dysregulation" OR "affect dysregulation") AND ("instrument\*" OR "measure" OR "measurement" OR "measuring" OR "questionnaire" OR "questionnaires" OR "scale" OR "scales") AND ("psychometric" OR "validity" OR "validation" OR "reliability" OR "internal consistency" OR "alpha" OR "cronbach" OR "re-test" OR "retest" OR "temporal stability")))) AND (at.exact("Article") AND la.exact("ENG" or "SPA") AND PEER(yes))
